1  
2  
3  
4  
5  
6  
7  
8  
9  
10  
11  
12  
13  
14  
15  
16  
17  
18  
19  
20  
21  
22  
23

## **Cortactin stabilizes actin branches by bridging activated Arp2/3 to its nucleated actin filament**

Tianyang Liu<sup>1</sup>, Luyan Cao<sup>2</sup>, Miroslav Mladenov<sup>2</sup>, Antoine Jegou<sup>3</sup>, Michael Way<sup>2,4\*</sup>, & Carolyn A. Moores<sup>1\*</sup>

<sup>1</sup> Institute of Structural and Molecular Biology, Birkbeck College, London WC1E 7HX, UK.

<sup>2</sup> The Francis Crick Institute, 1 Midland Road, London, NW1 1AT, UK.

<sup>3</sup> Université de Paris, CNRS, Institut Jacques Monod, 75013 Paris, France.

<sup>4</sup>Department of Infectious Disease, Imperial College, London W2 1PG, UK.

\* Joint corresponding authors

Carolyn A. Moores; ORCID ID: 0000-0001-5686-6290

E-mail: [c.moores@bbk.ac.uk](mailto:c.moores@bbk.ac.uk)

Michael Way; ORCID 0000-0001-7207-2722

E-mail: [Michael.Way@crick.ac.uk](mailto:Michael.Way@crick.ac.uk)

**Key words:** actin, Arp2/3, cortactin, cryo-EM, cytoskeleton

24 **SUMMARY**

25

26 **Regulation of the assembly and turnover of branched actin filament networks**  
27 **nucleated by the Arp2/3 complex is essential during many cellular processes**  
28 **including cell migration and membrane trafficking. Cortactin plays a key role in**  
29 **stabilizing actin filament branches by interacting with the Arp2/3 complex and**  
30 **actin filaments via its N-terminal Acidic domain (NtA) and 6.5 central**  
31 **unstructured 37 amino acid repeats, respectively <sup>1</sup>, but the mechanism of this**  
32 **is unclear. We determined the structure of cortactin-stabilized Arp2/3 actin**  
33 **branches using cryo-electron microscopy. We find that cortactin interacts with**  
34 **the new daughter filament nucleated by the Arp2/3 complex at the branch site**  
35 **rather than the initial mother actin filament. Cortactin preferentially binds**  
36 **activated Arp3 in contrast to other nucleation promoting factors (NPFs) <sup>2,3</sup>.**  
37 **Cortactin also stabilizes the F-actin-like interface of activated Arp3 with the first**  
38 **actin subunit of the new filament, and its central repeats extend along**  
39 **successive daughter filament subunits. Cortactin binding to Arp3 is**  
40 **incompatible with NPF interaction and its preference for activated Arp3 explains**  
41 **why it is retained at the actin branch. Our data have uncovered why cortactin**  
42 **displaces NPFs, while at the same time promoting synergy to regulate branched**  
43 **actin network dynamics.**

44 The actin cytoskeleton can form many different types of dynamic supramolecular  
45 arrays - from linear bundles to branched actin filament networks which underlie its  
46 functional diversity and adaptability<sup>4-9</sup>. Distinct F-actin arrays are formed by the  
47 localized activities of specific actin nucleating factors, actin binding proteins and  
48 myosin motors<sup>4,5,10</sup>. For example, branched actin networks are generated when a new  
49 “daughter” filament is nucleated from the side of a pre-existing “mother” filament by  
50 the Arp2/3 complex<sup>5,11,12</sup>. Branch formation requires activation of the seven subunit  
51 Arp2/3 complex which involves a conformational rearrangement of the complex so that  
52 a short-pitch helical F-actin-like template is formed by the Actin related proteins Arp2  
53 and Arp3 from which the fast growing barbed end of the daughter filament extends  
54<sup>13,14</sup>. Class 1 nucleation promoting factors (NPFs) such as WAVE and WASP activate  
55 Arp2/3 via a conserved C-terminal VCA domain, consisting of one to three Verprolin  
56 domains (also known as WASP-homology 2 domains) followed by Central and Acidic  
57 segments<sup>2,3,15-21</sup>. The VCA domain of Class 1 NPFs also stimulate nucleation by  
58 recruiting actin subunits to the activated Arp2/3 complex, from which these NPFs are  
59 subsequently released (*Extended Data Fig. 1a*)<sup>22-24</sup>. The correct functioning of Arp2/3-  
60 nucleated branched actin networks depends not only on their spatial and temporal  
61 assembly but also their stability and turnover<sup>25-29</sup>. The actin binding protein cortactin,  
62 a Class 2 NPF, plays a major role in stabilizing actin branches by interacting with the  
63 Arp2/3 complex and F-actin (**Fig. 1a**)<sup>30-33</sup>. Furthermore, although cortactin by itself  
64 can weakly activate the Arp2/3 complex, it synergizes with Class 1 NPFs to further  
65 stimulate efficient Arp2/3-mediated actin branch formation<sup>22,23,34</sup>. Given its central role  
66 in stabilizing branched actin networks, cortactin is important in many cellular  
67 processes such as epithelial integrity and intracellular trafficking as well as a range of  
68 pathologies including bacterial infection and cancer metastasis<sup>1,35-37</sup>. However,  
69 despite its functional importance, the precise mode of action of cortactin and its  
70 mechanism of synergy with Class 1 NPFs remains unknown.

71

72 We determined the structure of *in vitro* reconstituted cortactin-stabilized Arp2/3 actin  
73 branches using cryo-electron microscopy (cryo-EM) and single particle reconstruction  
74 at ~3.3 Å resolution (**Fig. 1 b**, *Extended Data Fig. 1, 2, Extended Data Table 1, Movie*  
75 *1*). To maximize the number of branches in our sample and therefore the possibility of  
76 visualizing the previously elusive binding site of cortactin, we used the most active  
77 isoform of human Arp2/3 (Arp2/3-C1B-C5L<sup>33</sup>), and also included capping protein in

78 our sample to limit daughter filament growth<sup>38-41</sup>. The resulting branch structure  
79 allowed us to visualize cortactin (*Extended Data Fig. 2, 3*) and showed that  
80 unexpectedly, cortactin connects the activated Arp2/3 complex and the daughter  
81 filament, in contrast to previous proposals that cortactin binds to the mother filament  
82 (**Fig. 1 b**)<sup>23,34</sup>. In the presence of cortactin, the overall conformation of the activated  
83 Arp2/3 complex at the junction of mother and daughter filaments is similar to previous  
84 cryo-EM structures<sup>13,42,43</sup> (*Extended Data Fig. 4a, b, Movie 1*). The daughter filament  
85 consists of 4 subunits (DA1 - DA4), each with ADP bound, and its barbed end is  
86 terminated by capping protein<sup>38-41</sup>. The cortactin density that extends along this short  
87 daughter filament corresponds to the first cortactin repeat (**Fig. 1b**). No density  
88 corresponding to cortactin is observed on the ADP-bound mother filament (consisting  
89 of MA1 – MA6 in our image processing scheme, *Extended Data Fig. 2*). Both mother  
90 and daughter filaments adopt canonical ADP-F-actin structures<sup>44,45</sup> and Arp2 and  
91 Arp3 are also bound to ADP (*Extended Data Fig. 4b-d*). Overall, our structure shows  
92 that rather than modifying the filaments at actin branches, cortactin branch  
93 stabilization is mediated by the protein-protein contacts that cortactin forms with the  
94 activated Arp2/3 complex and the daughter filament<sup>30-32</sup>.

95  
96 Cortactin NtA domain residues 21 - 79 form electrostatic and hydrophobic interactions  
97 with all four Arp3 subdomains, as well as contacting ArpC2 (**Fig. 2a**, *Extended Data*  
98 *Fig. 5a-d*). The cortactin DWE motif (residues 21 – 23) that is essential for the  
99 interaction with Arp2/3<sup>31</sup> inserts into a positively charged pocket of Arp3, while  
100 residues 24 – 54 adopt a meandering trajectory across the Arp3 surface (**Fig. 2 a, b**,  
101 *Extended Data Fig. 5*). At residue 55, the NtA domain turns ~90° on the surface of  
102 Arp3 and forms an amphipathic  $\alpha$ -helix (residues I55 – T76) which binds in a  
103 hydrophobic cleft on Arp3 and points towards the daughter filament (**Fig. 2a, c**). This  
104 cortactin helix binds adjacent to the Arp3 hinge helix (residues 145 – 154) which is key  
105 in mediating inactive-active Arp2/3 complex structural transitions<sup>13,14,43</sup>.

106  
107 The cortactin NtA  $\alpha$ -helix stabilizes the Arp3 W-loop (residues 180 – 187) in a  
108 conformation that has been previously observed only in activated Arp2/3 and is distinct  
109 from that seen in the inactivated Arp2/3 complex<sup>3,13,46,47</sup>. As a result, the structural  
110 groove at the barbed end of Arp3 is open and promotes the interaction with DA1 of

111 the new daughter filament (**Fig. 2d**). The contacts formed between activated Arp3 and  
112 DA1 mimic the longitudinal contacts along F-actin<sup>13,14</sup> and involve insertion of  
113 subdomain 2 of DA1 - specifically its so-called D-loop - in the barbed-end of Arp3 (**Fig.**  
114 **2d**). Further, the loop within Arp3 (residues 155 - 164) that follows the hinge helix -  
115 which we now term the cortactin loop - makes contacts with the cortactin NtA  $\alpha$ -helix  
116 via a distinct conformation compared to branch structures in the absence of cortactin  
117 (**Fig. 2e**). The structure is consistent with a model in which the interaction of the  
118 cortactin NtA domain with activated Arp2/3 complex also stabilizes the interface of  
119 Arp3 with DA1 of the daughter filament.

120

121 The first cortactin central repeat (residues 80 - 116) extends ~5.5 nm from the C-  
122 terminus of the NtA  $\alpha$ -helix longitudinally on the daughter filament to connect the two  
123 successive subunits DA1 and DA3 (**Fig. 3a**). D116, the final residue of the first  
124 cortactin central repeat, is positioned on DA3 in an equivalent position to the first  
125 repeat residue (A80) on DA1 (**Fig. 3a**). Based on the cortactin F-actin interaction in  
126 our structure, we modelled how the cortactin central repeats would interact with a  
127 longer daughter filament. Our model shows that the second repeat would bind along  
128 the daughter filament in the same way as the first repeat to connect DA3 and DA5  
129 (**Fig. 3b**). Furthermore, it predicts that the cortactin repeats, including the C-terminal  
130 half repeat, would extend to the barbed end of DA13, a half-turn of the F-actin helix  
131 (**Fig. 3c, Movie 2**). The conservation of interacting residues within the cortactin repeats  
132 is also consistent with the repeating pattern of interactions with the hydrophobic and  
133 hydrophilic regions of the F-actin surface (**Fig. 3d**). Given the conserved amino acid  
134 distribution between all 6.5 repeats and the observed binding pattern of the first central  
135 repeat, it is likely that cortactin repeats act together to maximize branch stability. Our  
136 model shows how lysine acetylation in cortactin central repeats would reduce cortactin  
137 F-actin binding activity and thereby impede cell motility<sup>48</sup>. The observation that  
138 cortactin binds exclusively along the daughter filament now also explains why cortactin  
139 stabilizes linear actin filaments nucleated by SPIN90-Arp2/3 complexes in the  
140 absence of a mother filament<sup>49</sup>.

141

142 Our data show that the daughter filament is stabilized directly by the cortactin repeats  
143 binding along intra-strand subunits of the daughter filament (**Fig. 4a**). In addition, they

144 also reveal that the NtA indirectly stabilizes the branch by forming extensive  
145 interactions with activated Arp3 to promote DA1 D-loop insertion (**Fig. 2a**, *Extended*  
146 *Data Fig. 5*). The interactions of cortactin NtA and Arp3 are specific to its activated  
147 conformation as computational docking of our NtA structure onto the inactive Arp3  
148 conformation generates structural clashes (**Fig. 2a**, *Extended Data Fig. 5e*). To assess  
149 the idea that NtA alone can stabilize actin branches because of its preference for  
150 activated Arp3, we tested the ability of cortactin NtA to maintain branches in an *in vitro*  
151 debranching assay (**Fig. 4b**, *Extended Data Fig. 6*). NtA does provide protection from  
152 debranching compared to the actin-only control. However, it was less effective than  
153 the full-length cortactin, consistent with the notion that central repeat binding  
154 maximizes branch stabilization.

155  
156 Our observation that cortactin stabilizes activated Arp3 contrasts with VCA-containing  
157 class 1 NPFs and has implications for the coordinated regulation of actin branches.  
158 Our structure shows how binding of cortactin NtA to Arp3 would sterically block VCA  
159 binding sites - particularly of its C-helix - to compete for Arp3 binding (**Fig. 4c, d**). VCA  
160 binding to Arp3 has only been observed on the inactive complex<sup>2,3</sup>, it does not readily  
161 associate with activated Arp3 in MD simulations<sup>50</sup>, and VCA binding would clash with  
162 the D-loops of incoming DA1 and DA2<sup>13</sup>. Consistent with a preference for inactivated  
163 Arp2/3, N-WASP-CA promotes branch destabilization in our debranching assay<sup>49</sup>  
164 (**Fig. 4b**, *Extended Data Fig. 6*). The overlapping binding sites of cortactin NtA helix  
165 and VCA helix are centred at the junction of Arp3 subdomains 1 and 3; the relative  
166 position of these subdomains alters on Arp2/3 activation, and each protein is sensitive  
167 to these changes (**Fig. 4d**). Further, the preferential binding of VCA and cortactin to  
168 inactive and activated Arp3 respectively provides a mechanistic basis for displacement  
169 models of the synergistic activation of Arp2/3 by VCA and cortactin. VCA release from  
170 nascent actin branches is a necessary and rate-limiting step for branch formation and  
171 is accelerated by cortactin<sup>22-24</sup>. Our structure shows that cortactin displaces the NPF  
172 CA domain, both by competition and because the activated Arp3 conformation favours  
173 NtA binding. The previously reported synergy of class 1 NPF VCA domains and  
174 cortactin at Arp2/3 branches therefore arises from VCA binding to and activating  
175 Arp2/3 followed by NtA accelerating VCA release and stabilizing the Arp2/3 activated  
176 state<sup>22,23,34</sup>. Further, the observation that cortactin alone is only a weak activator of  
177 Arp2/3 nucleation has been puzzling and was thought to be because of its inability to

178 recruit actin monomers to the nascent branch, unlike Class 1 NPFs<sup>32,51</sup>. Our structure  
179 now shows that this weak stimulation of Arp2/3 nucleation is also because of the  
180 preference of the cortactin NtA for activated Arp3.

181

182 Our data reveal exactly how cortactin supports Arp2/3-mediated actin branches by  
183 binding and stabilizing the active conformation of Arp3 and the longitudinal subunit  
184 interactions along the daughter filament. It is also striking that our structure-based  
185 model reveals that the interaction mode of the 6.5 cortactin central repeats correspond  
186 precisely to a half-turn of the F-actin helix. In contrast, the haemopoietic specific  
187 cortactin paralogue, HS1, only has 3.5 repeats and would be predicted only to interact  
188 with DA1, DA3, DA5 and DA7, consistent with its lower affinity for F-actin<sup>52</sup>. This  
189 indicates how the regulated expression of cortactin and its relatives in different tissues  
190 could tune the local dynamics of branched actin networks. Within the Arp2/3 complex,  
191 Arp3 not only forms the structural template for the nucleated daughter filament, but its  
192 conformation favours binding partners such as cortactin, and may also communicate  
193 to other cytoskeleton regulators such as the de-branching factor coronin that the  
194 complex is activated<sup>33</sup>. Since actin branch turnover is critical for normal functioning of  
195 the actin cytoskeleton, our visualization of cortactin has important implications for how  
196 it protects against de-branching by coronin, whether via competition for Arp2/3  
197 binding, protection of the daughter filament junction or both<sup>28,33,53-55</sup>. This in turn could  
198 determine whether Arp2/3 complexes remain bound to mother filaments following de-  
199 branching and are thus available for further rounds of nucleation. Our discovery of an  
200  $\alpha$ -helix in the cortactin NtA and characterisation of its binding site at the junction of  
201 Arp3 subdomains 1 and 3 highlights the equivalence of this binding site to the binding  
202 cleft on actin where a large number of actin binding proteins interact and which also  
203 mediates longitudinal contacts in F-actin<sup>44,45,56</sup>. This emphasizes the conserved  
204 nature of the conformational changes that both Arp3 and actin undergo during actin  
205 nucleation and polymerization, and the importance of this hotspot in both proteins for  
206 binding regulators.

207

## 208 **Acknowledgements**

209 This project has received funding from the European Research Council (ERC) under  
210 the European Union's Horizon 2020 research and innovation programme (grant

211 agreement No 810207 to M.W. and C.A.M.). L.C. was supported by the European  
212 Union's Horizon 2020 Marie Skłodowka-Curie individual fellowship program (H2020-  
213 MSCA-IF-101028239 – MolecularArp). A.J. was supported by the ERC (grant StG-  
214 679116). MW is supported by the Francis Crick Institute, which receives its core  
215 funding from Cancer Research UK (CC2096), the UK Medical Research Council  
216 (CC2096), and the Wellcome Trust (CC2096). Cryo-EM data collected at the Institute  
217 of Structural and Molecular Biology (ISMB), Birkbeck was on equipment funded by the  
218 Wellcome Trust, U.K. (202679/Z/16/Z and 206166/Z/17/Z). We thank N. Lukoyanova  
219 and S. Chen for electron microscope support, D. Houldershaw for computing support  
220 at Birkbeck.

221

## 222 **Competing interests statement**

223 No competing interests declared.



## 224 **METHODS**

### 225 **Protein purification**

226 Full length mouse cortactin (1 - 546, UniProt Q60598), human SPIN90 C-terminus  
227 (267 - 715, UniProt Q9NZQ3-3), GST-tagged human N-WASP-VCA and N-WASP-CA  
228 (392 - 505 and 453 - 505 respectively, UniProt O00401) were purified following the  
229 protocol described in Cao *et al* <sup>49</sup>. Cortactin NtA (1 - 77) was purified following the  
230 same method as full-length cortactin. Human Arp2/3 complex containing ArpC1B/C5L  
231 isoforms (UniProt P61160, P61158, O15143, O15144, O15145, P59998, Q9BPX5)  
232 was purified following the protocol described by Baldauf *et al* <sup>57</sup>.

233

234 Mouse capping protein  $\alpha 1\beta 2$  (UniProt P47753 and P47757-2) were co-expressed in  
235 BL21 Star<sup>TM</sup> DE3 cells using a pRSFDuet-1 plasmid with N-terminal 6\*His tag fused  
236 to the  $\alpha 1$  subunit. Cells were grown at 37°C and protein expression was induced with  
237 20  $\mu$ M IPTG when OD reached 1.1. After adding IPTG, the cells were grown overnight  
238 at 16°C. The next day, cells were harvested by centrifugation at 5,000 g for 15 mins,  
239 resuspended and lysed using a high-pressure homogeniser (Avesti Emusiflex C3) in  
240 lysis buffer (50 mM Tris pH 8.0, 138 mM NaCl, 2.7 mM KCl with EDTA-free protease  
241 inhibitor (Roche)). The cell lysate was centrifuged at 49,500  $\times$  g for 30 mins to remove  
242 cell debris. The supernatant was transferred to a column with Ni-NTA Resin (Merck)  
243 and incubated for 1 hour at 4°C. The column was washed with lysis buffer and His-  
244 tagged capping protein dimer was eluted from the column in elution buffer (50 mM Tris  
245 pH 8.0, 138 mM NaCl, 2.7 mM KCl with 250mM Imidazole). The eluted proteins were  
246 concentrated to 0.5ml using Amicon Ultra-4 ml Centrifugal Filters (Millipore) and  
247 loaded onto a gel filtration column (Superdex 200 Increase 10/300 GL, GE Healthcare)  
248 on an ÅKTA system (GE Healthcare). The peak fractions containing capping protein  
249 were collected and buffer exchanged into a low-salt buffer (10 mM Tris pH 7.5, 10 mM  
250 KCl and 1mM DTT). Finally, the proteins were loaded onto a 1ml HiTrap Q HP column  
251 (GE Healthcare). Capping protein heterodimers were separated from other minor  
252 protein contaminants by linear gradient elution. The linear gradient was generated by  
253 combining high-salt buffer (10 mM Tris pH 7.5, 400 mM KCl and 1mM DTT) with low  
254 salt buffer (10 mM Tris pH 7.5, 10 mM KCl and 1mM DTT).  $\beta/\gamma$  non-muscle actin from  
255 purified porcine brain was purchased from Hypermol (Cat 8401-01) and reconstituted

256 with 200  $\mu$ l ultrapure water to obtain a 1 mg/ml solution in a buffer with 2 mM Tris-HCl  
257 pH 8.2, 2.0 mM ATP, 0.5 mM DTT, 0.1 mM  $\text{CaCl}_2$ , 1mM  $\text{NaN}_3$  and 0.2% disaccharides.

258

### 259 **Cryo-EM sample preparation**

260 Branch reconstitution conditions were adapted from those used to reconstitute  
261 *Schizosaccharomyces pombe* Arp2/3 complex-bound actin filaments<sup>14</sup>. Protein  
262 concentrations were optimized to enhance short actin branch formation and minimize  
263 the preferred orientation problem caused by the “Y”-shape of actin branches on the  
264 cryo-EM grid: 1) actin concentration was kept low to prevent spontaneous nucleation  
265 and limit filament growth; 2) a high concentration of capping protein was added to limit  
266 daughter filament growth. First, 1.7  $\mu$ M Arp2/3, 1.7 $\mu$ M VCA, 16.1  $\mu$ M SPIN90, 0.8  $\mu$ M  
267 actin and 3.2  $\mu$ M capping protein were mixed in 14.9  $\mu$ l buffer containing 20 mM  
268 HEPES pH 7.5, 50 mM KCl, 1 mM EGTA, 1 mM  $\text{MgCl}_2$ , 0.2 mM ATP and 1 mM DTT  
269 and incubated at room temperature for 20 mins. Then, 4.5  $\mu$ l of 23.8  $\mu$ M actin was  
270 added in 9 separate additions that were together incubated at room temperature for  
271 20 mins. 1.2  $\mu$ l of 80  $\mu$ M capping protein was added in 2 separate additions with the  
272 3<sup>rd</sup> and 7<sup>th</sup> addition of actin. After the final addition of actin, 1.7  $\mu$ M cortactin was added  
273 followed by another 20 min incubation. Finally, 10  $\mu$ M phalloidin (Invitrogen™) was  
274 added to stabilize the actin branches.

275

276 Following incubation, 4  $\mu$ l of the final reconstitution mix was applied to a glow-  
277 discharged C-flat 1.2/1.3 grid. The grid was plunge frozen using EM GP2 Automatic  
278 Plunge Freezer (Leica) with the following settings: sensor blotting, back blotting,  
279 additional movement of 0.3 mm, blotting time of 5 s, humidity of 98%, and temperature  
280 of 22 °C.

281

### 282 **Cryo-EM data acquisition**

283 Cryo-EM data (12,073 movies) were collected on a Titan Krios microscope (Thermo  
284 Fisher Scientific) operated at an accelerating voltage of 300 kV with a nominal  
285 magnification of 81K and pixel size of 1.067 Å. The data were collected with a K3  
286 detector operating in super-resolution mode (bin2) with a BioQuantum energy filter  
287 (Gatan). 50 frames for each micrograph were collected using EPU software with 14.8

288 e<sup>-</sup>/pixel/s dose rate, 3.8 s exposure time, 49.4 e<sup>-</sup>/Å<sup>2</sup> total electron exposure dose and  
289 a defocus range from -0.9 to -2.4 μm.

290

### 291 **Cryo-EM data processing**

292 Cryo-EM data were processed using CryoSPARC v3<sup>58</sup>. Movies were motion-  
293 corrected using Patch motion. Contrast Transfer Function (CTF) parameters were  
294 estimated using Patch CTF. 8518 micrographs with CTF fit resolution < 6.4 Å and total  
295 full-frame motion distance < 50 pixels were selected for further data processing. Blob  
296 picker with a minimum diameter of 150 Å and a maximum diameter of 200 Å was used  
297 for particle picking followed by particle extraction with a box size of 368 pixels and  
298 binning factor of 4. 2,001,580 extracted particles were subjected to multiple rounds of  
299 2D classification to remove contaminants, carbon and non-branched portions of actin  
300 filaments. Class averages featuring various views of actin branch junction were  
301 selected as templates for template picking. 3,247,396 template-picked particles were  
302 subjected to multiple rounds of 2D classification. The particle sets selected from the  
303 blob picker (167,590 particles) and template picker (244,162 particles) were subjected  
304 to *ab-initio* reconstruction with 2 classes respectively. After *ab-initio* reconstruction,  
305 un-binned particles from these classes were re-extracted with box size of 440 and  
306 each were subjected to Homogeneous refinement with the best branch-like *ab-initio*  
307 volume as the initial model. After homogeneous refinements and duplicate removal,  
308 the two stacks of particles were combined. The combined 179,923 particles were then  
309 subjected to a first Non-Uniform (NU)-refinement followed by Heterogeneous  
310 refinement with 3 classes to further classify particles. Class 1 volume exhibits  
311 additional density on one side of the mother filament, and these particles were  
312 discarded. The remaining 130,915 particles from class 2 and class 3 were combined  
313 and subjected to a second NU refinement. Because all 3 classes are different only on  
314 the mother filament region, we referred to the first NU-refinement reconstruction  
315 before heterogeneous refinement as the Arp2/3-daughter filament consensus map.  
316 The second NU-refinement reconstruction was referred to as the mother filament  
317 consensus map (*Extended Data Fig. 2*).

318

319 Local refinement with a mask around the mother filament on the mother filament  
320 consensus map was used to improve the mother filament density. Likewise, the  
321 Arp2/3-daughter filament consensus map was divided into three overlapping

322 segments (the Arp2/3 complex, the daughter filament and the capping protein) and  
323 locally refined to improve the density of each segment. Before running local refinement  
324 on daughter filament and capping protein, the particles and consensus map were re-  
325 centred on DA3 using Volume Alignment Tools in cryoSPARC to improve the  
326 alignment because they are at the periphery of the consensus reconstruction. After  
327 local refinement on the daughter filament, the complete first cortactin F-actin repeat  
328 density was observed. After local refinement on capping protein, the capping protein  
329 density was well resolved. 3D classification showed that the daughter filament  
330 segment of all 3 classes had the identical feature containing only four actin subunits  
331 plus one capping protein heterodimer. A high molar ratio of capping protein to actin in  
332 our reaction mix contributes to the short daughter filament. The template picking and  
333 ab-initio reconstruction step may also bias the particle selection used in our  
334 reconstruction. Global resolution and local resolution of local refined maps are  
335 estimated in cryoSPARC (*Extended Data Fig. 3*).

336

### 337 **Model building**

338 The four locally refined reconstructions were used to model Arp2/3 and cortactin NtA,  
339 daughter filament and cortactin first central repeat, capping protein and mother  
340 filament (*Extended Data Fig. 2,3*). Models of all seven Arp2/3 subunits,  $\beta$  actin and  
341 capping protein created with the AlphaFold Monomer v2.0 pipeline were used initially  
342 <sup>59,60</sup>. They were rigidly fit into EM density using ChimeraX <sup>61</sup> followed by molecular-  
343 dynamics flexible fitting using ISOLDE<sup>62</sup>. Namdinator <sup>63</sup> was used to optimize bond  
344 geometry, and ISOLDE and Coot <sup>64</sup> were used at the end of the model building process  
345 to manually fix Ramachandran outliers, rotamer outliers and clashes. AlphaFold  
346 predicts the N-terminus of cortactin with low confidence except for one 6-turn  $\alpha$ -helix,  
347 corresponding to the  $\alpha$ -helix in our EM density. The AlphaFold-predicted  $\alpha$ -helix  
348 (residue 55 - 76) was well fitted into the EM density with bulky side chains on one side  
349 of the  $\alpha$ -helix facilitating its positioning. After the positioning of the NtA helix, the  
350 flanking cortactin residues (21 – 54 and 80 - 116) were manually built using Coot <sup>64</sup>.

351

### 352 **Structural analysis and visualization**

353 Structural figures and movies were made with ChimeraX <sup>61</sup>. Rise and twist angles  
354 shown in *Extended data Fig. 4* were calculated in PyMOL Molecular Graphics System,

355 Version 2.5.4 Schrödinger, LLC. The distance between interacting atoms in *Extended*  
356 *Data Fig. 5* were measured in ChimeraX.

357

### 358 **Dissociation of branches by cortactin and CA motifs**

359 Microfluidics experiments were done with Poly-Dimethyl-Siloxane (PDMS, Sylgard)  
360 chambers with three inlets and one outlet based on the original protocol from  
361 Jégou *et al* <sup>65</sup>. The microfluidic flows were monitored by a MFCS and Flow Units  
362 (Fluigent). Experiments were performed in buffer containing 5 mM Tris–HCl pH 7.0,  
363 50 mM KCl, 1 mM MgCl<sub>2</sub>, 0.2 mM EGTA, 0.2 mM ATP, 10 mM DTT, 1 mM DABCO,  
364 and 0.1% BSA. The temperature was maintained at 25°C by an objective heater (Oko-  
365 lab). Actin filaments were visualized using TIRF microscopy (Nikon TiE inverted  
366 microscope, iLAS2, Gataca Systems) equipped with a 60× oil-immersion objective.  
367 Images were acquired using an Evolve EMCCD camera (Photometrics), controlled  
368 with the Metamorph software (version 7.10.4, from Molecular Devices).

369

370 Pointed end anchored mother filaments (15% labelled with Alexa-488) and their  
371 branches (15% labelled with Alexa-568) were generated in a microfluidics chamber  
372 with 20 μm height and 1600 μm width as described in Cao *et al* <sup>49</sup>. During the  
373 experiment, actin branches were exposed to 0.3 μM actin as control or with an  
374 additional 0.1 μM cortactin, GST-N-WASP-VCA or their mutants. The flow rate was  
375 set as high as 16 μL/min during the measurement. The forces, ranging from 0.6 to 1  
376 pN applied on the daughter filaments, are identical in each experiment. For each  
377 condition, the survival fraction of branches was quantified and plotted over time (**Fig.**  
378 **4b**). The time points when half of the actin branches disappeared under different  
379 experimental conditions were plotted for comparison (*Extended Data Fig. 6b*).

380

### 381 **Data availability**

382 The cryo-EM maps and the corresponding structural coordinates were deposited  
383 under the accession codes PDB ID: 8P94 and EMDB: 17553 (Daughter filament  
384 consensus reconstruction), 17554 (Arp2/3 complex local refined reconstruction),  
385 17555 (daughter filament local refined reconstruction), 17556 (capping protein local  
386 refined reconstruction), 17557 (mother filament local refined map reconstruction),  
387 17558 (mother filament consensus reconstruction).

388

389 **FIGURES**

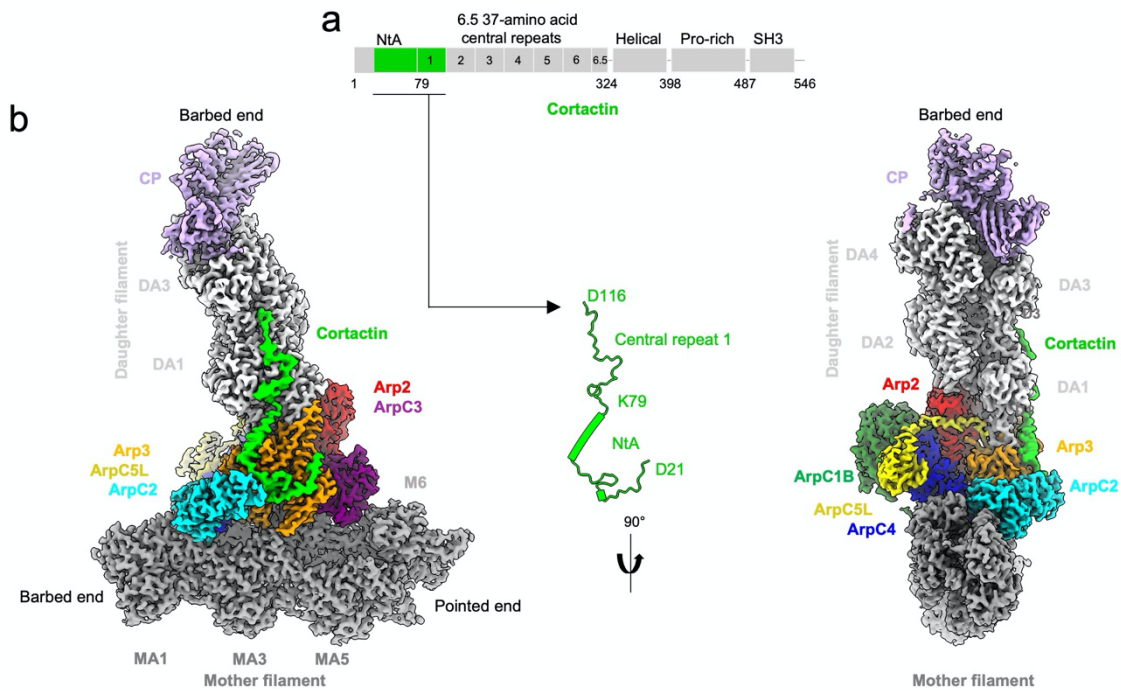

390

391 **Figure 1. Cortactin binds the daughter filament at Arp2/3-mediated actin**  
392 **branches.**

393 **a)** Cortactin domain organisation. **b)** Overview of the composite cortactin-stabilized  
394 Arp2/3 actin branch cryo-EM reconstruction, assembled from four local refined  
395 reconstructions as shown in Extended Data Fig. 2 and 3. Density of individual proteins  
396 in the complex are coloured according to the labels, while mother and daughter  
397 filament subunits are coloured dark and light grey and labelled MA1, MA3, MA5 and  
398 MA6 and DA1 – DA4 respectively. The free barbed and pointed ends of mother and  
399 daughter filaments are also labelled. Central inset shows the cortactin model  
400 calculated from the cryo-EM reconstruction, with the visualized regions mapped on to  
401 the cortactin schematic in a) as indicated.

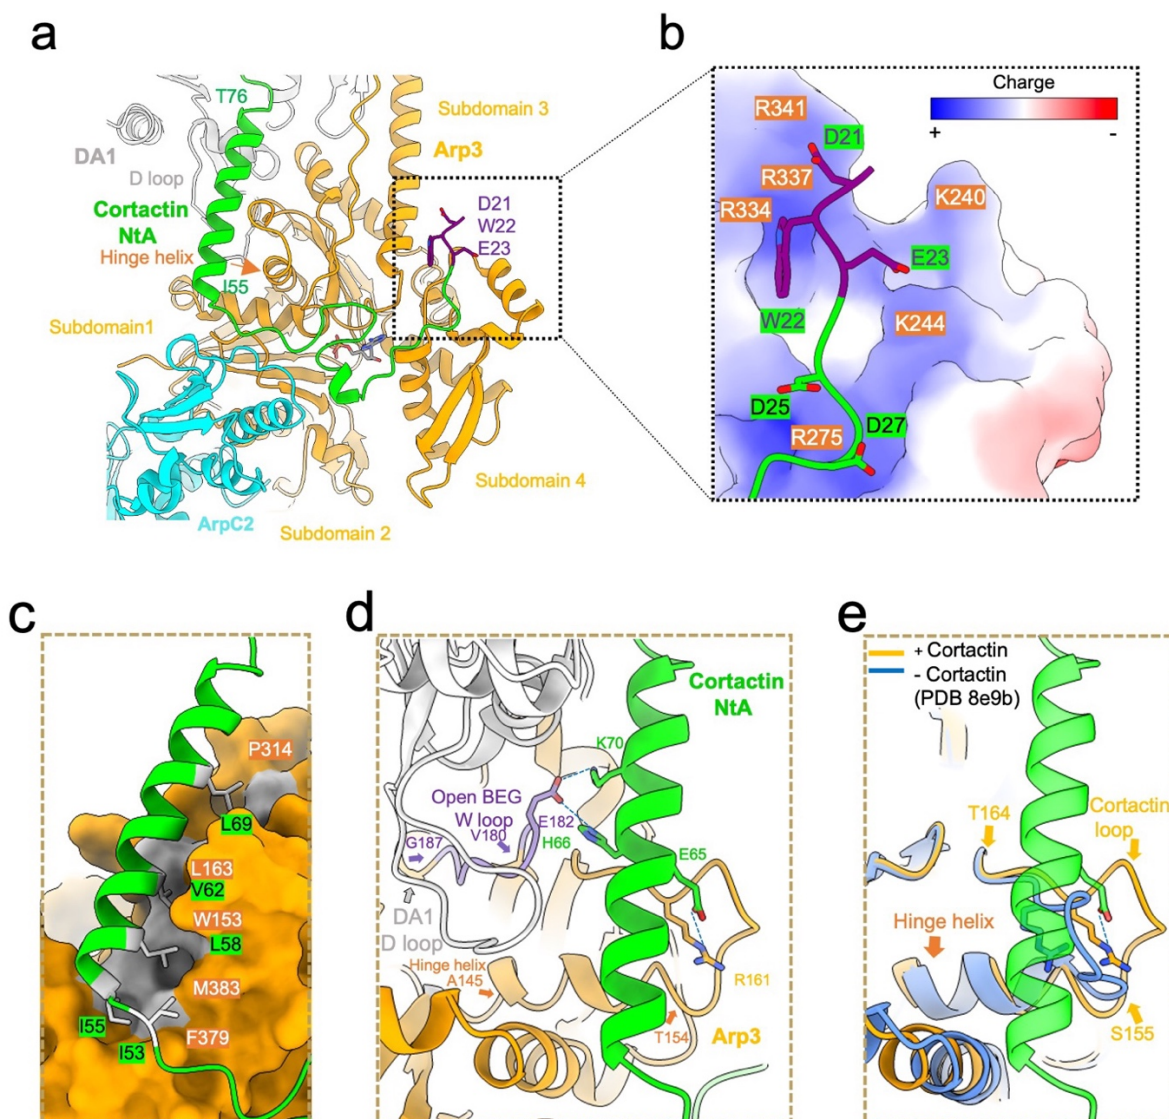

402

403 **Figure 2. Cortactin NtA binds to activated Arp3.**

404 **a)** Overview of cortactin NtA (lime and purple) and its interactions with Arp3 (orange)  
 405 and ArpC2 (cyan). DWE motif residues are shown in purple stick representation, while  
 406 the rest of cortactin NtA is depicted in ribbon representation. Cortactin residues D21 -  
 407 N54 meander across the Arp3 surface while residues I55 - T76 form an amphipathic  
 408  $\alpha$ -helix. Subdomains in Arp3 are labelled and the Arp3 hinge helix at the junction of  
 409 subdomain 1 and 3 is indicated with an orange arrow. DA1 is the first subunit of the  
 410 daughter filament which via the D-loop in its subdomain 2, forms longitudinal contacts  
 411 with Arp3. Detailed views of interactions are shown in *Extended Data Fig. 5a-d*. **b)**  
 412 Electrostatic interaction of the negatively charged cortactin N-terminal region that  
 413 inserts into a positively charged pocket of Arp3. Arp3 is depicted in surface  
 414 representation, acidic regions in red, basic regions in blue with individual basic

415 residues indicated in orange. Cortactin is depicted in ribbon model, D21-W22-E23  
416 motif in purple stick representation, residues 24 - 29 in lime with acidic residues shown  
417 in stick representation. **c)** Hydrophobic interaction of the cortactin NtA  $\alpha$ -helix (green  
418 ribbon model) with a hydrophobic groove on the surface of Arp3 (orange space-filling  
419 representation, with hydrophobic regions in grey). Residues on the interaction surface  
420 of cortactin and Arp3 are labelled in lime and orange respectively. **d)** The cortactin NtA  
421  $\alpha$ -helix stabilizes the activated Arp3 W-loop (residue 180 – 187, purple) conformation  
422 to enable DA1 actin subunit binding via its D-loop in the open barbed end groove  
423 (BEG) of Arp3. Residues forming salt bridges are shown in stick representation. The  
424 distances between interacting residues are shown in Extended Data Fig. 5a-d. **e)** The  
425 cortactin NtA  $\alpha$ -helix (lime) stabilizes and interacts with a specific conformation of the  
426 Arp3 loop (residues 155 - 164), which we term the cortactin loop (in orange). This loop  
427 conformation is distinct in the presence of cortactin and is different in activated Arp2/3  
428 in the absence of cortactin (blue ribbon).



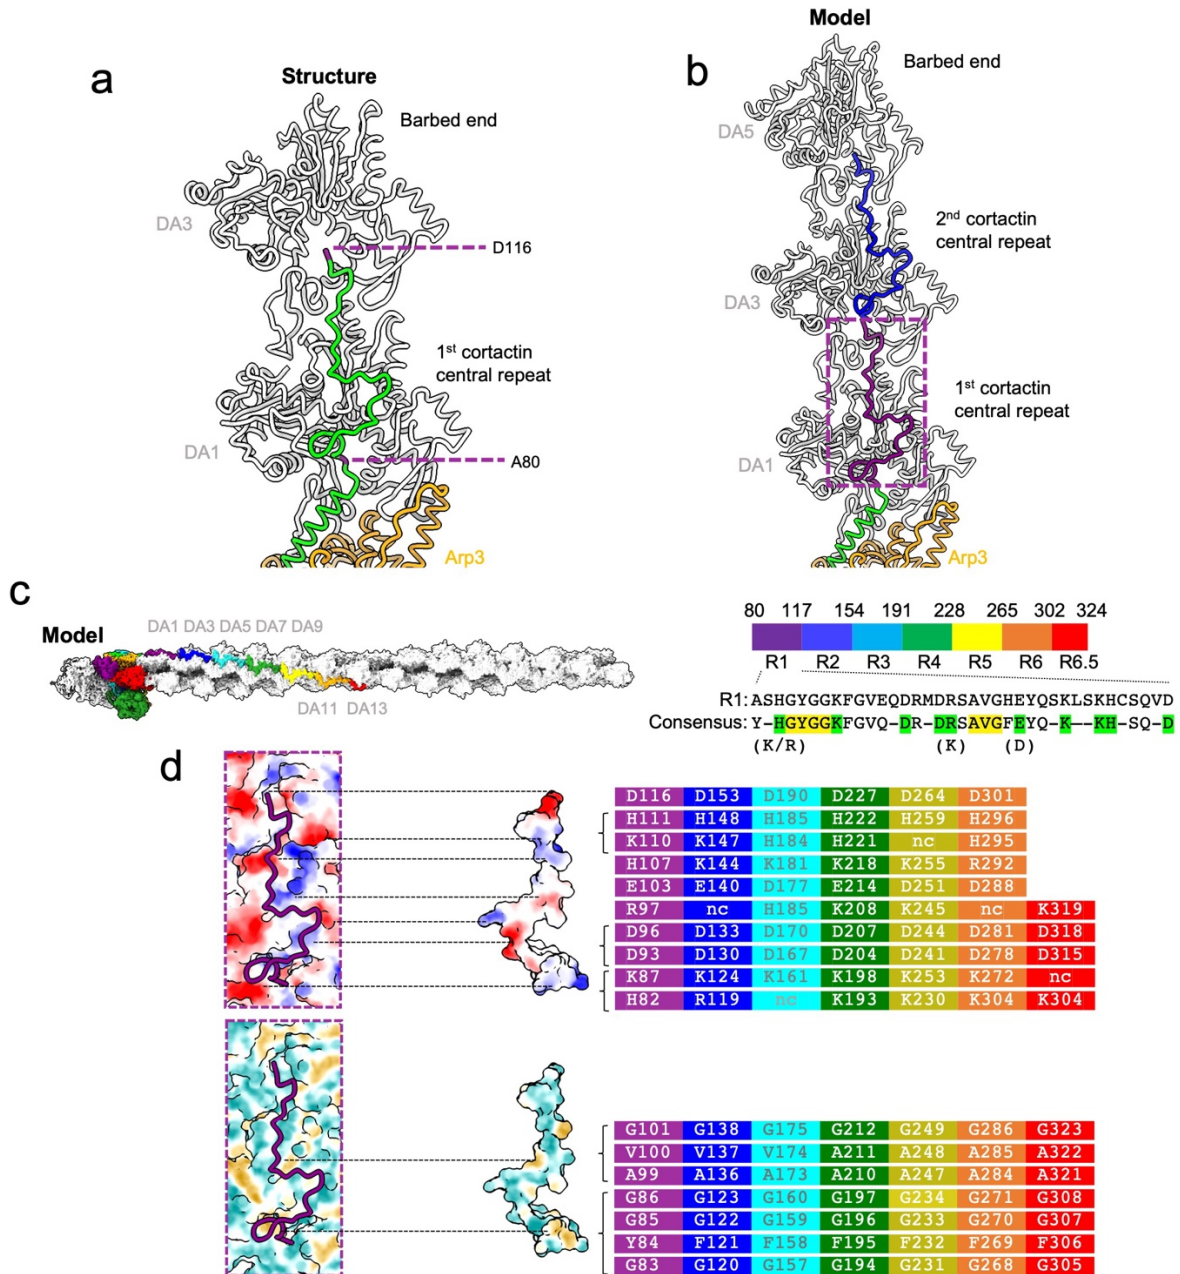

429

430 **Figure 3. Cortactin repeats bind the daughter filament.**

431 **a)** The first cortactin repeat (in green) binds longitudinally along the daughter filament  
 432 and bridges between DA1 and DA3 actin subunits (in grey). The first and last residues  
 433 of the first cortactin repeat are labelled, coloured in purple and their positions on DA1  
 434 and DA3 subunits respectively are circled in purple. See also *Movie 2*. **b)** Cortactin  
 435 repeats are predicted to bind equivalent subunit positions along the same strand of  
 436 the daughter filament. The first repeat that bridges between DA1 and DA3 subunits is  
 437 shown in purple (as in a)) and the second repeat that bridges between DA3 and DA5  
 438 is shown in blue. **c)** Left: The 6.5 cortactin repeats are predicted to bind longitudinally  
 439 along 7 daughter actin filament subunits. The modelled cortactin central repeats are

440 coloured from N- to C-terminus in purple, blue, cyan, green, yellow, orange and red.  
441 Right: Amino acid sequence of 1<sup>st</sup> repeat and the consensus sequence of the 6.5  
442 central repeats. Amino acid residues present in more than five of the 6.5 repeats are  
443 included in the consensus sequence. Charged residues (K/H/R and D/E) are grouped  
444 together in the analysis. Conserved residues in green form potential electrostatic  
445 interactions with actin subunits. Conserved residues in yellow form potential  
446 hydrophobic interactions with actin subunits as indicated in d). **d)** Top: Binding surface  
447 of DA1-actin and cortactin first central repeat coloured by electrostatic potential and  
448 shown in open book representation. Blue, positively charged; Red, negatively  
449 charged. Conserved charged residues in cortactin are shown and coloured according  
450 to the individual central repeat they are in as in Fig. 3c. Dotted lines indicate interaction  
451 regions in the assembly. Bottom: Binding surface of DA1-actin and cortactin first  
452 central repeat coloured by hydrophobicity and shown in open book representation.  
453 Yellow = hydrophobic; Cyan = hydrophilic. Conserved hydrophobic residues are  
454 shown and coloured according to the individual central repeat they are in as in **Fig.**  
455 **3c**; nc = not conserved. Dotted lines indicate interaction regions in the assembly.

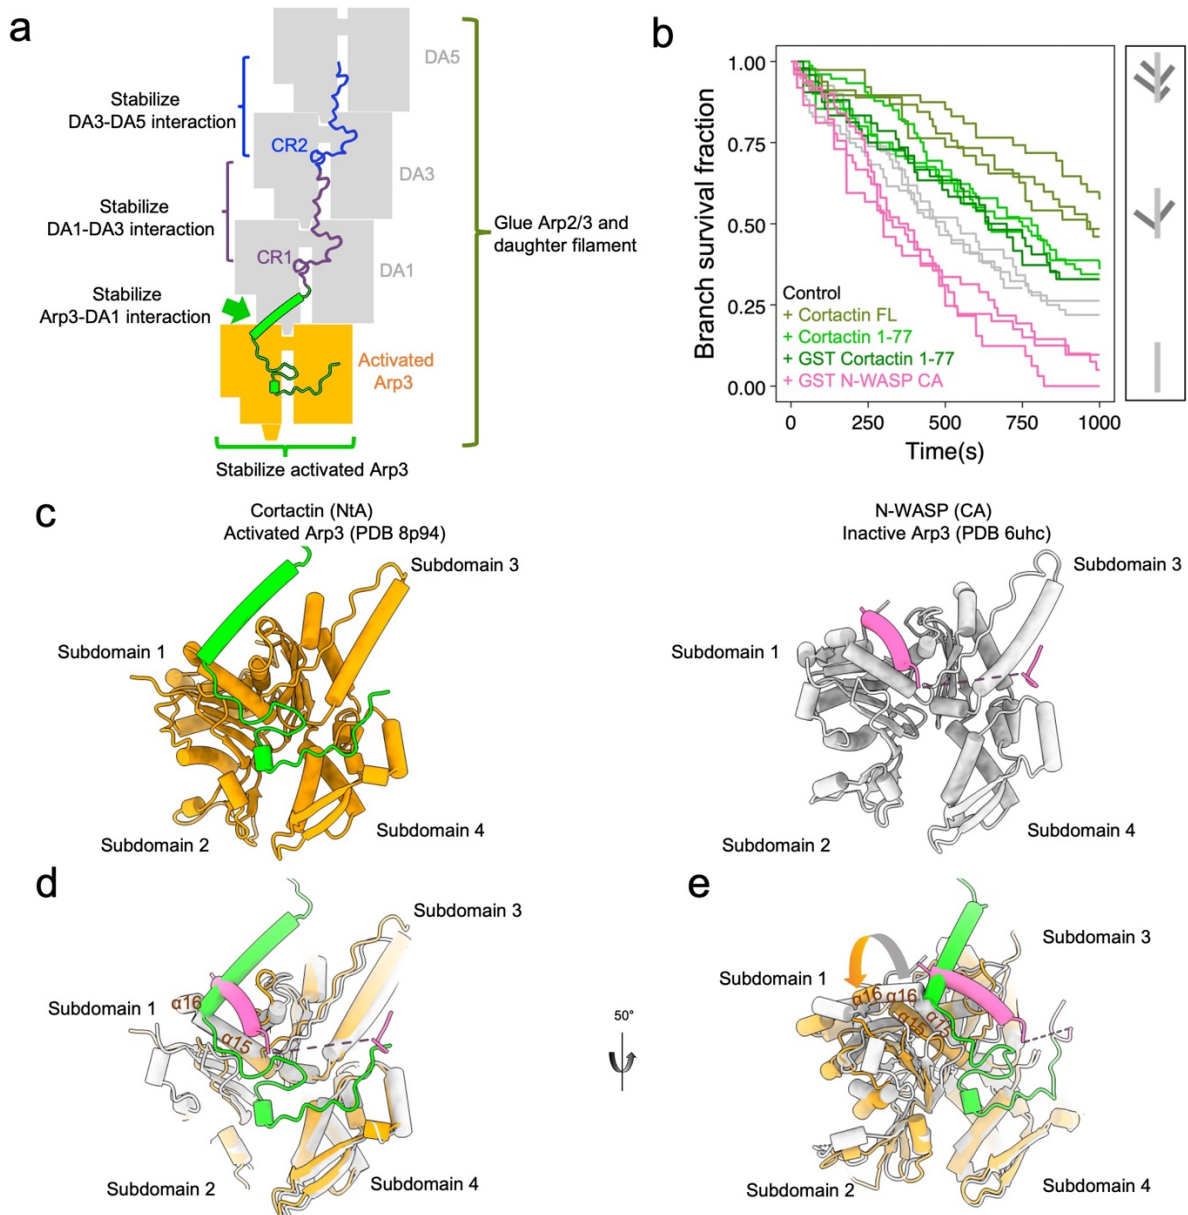

456

457 **Figure 4. The binding site of NtA cortactin on Arp3 explains its synergy with**  
 458 **VCA domains.**

459 **a)** Schematic showing how cortactin stabilizes the actin branch junction. **b)** The  
 460 survival fraction of Arp2/3 mediated branches over time. The dissociation of Arp2/3  
 461 mediated branches was observed and quantified in the presence of 0.1  $\mu$ M full length  
 462 cortactin (olive green), or in the presence of 0.1  $\mu$ M cortactin NtA (dark green for GST-  
 463 NtA and light green for untagged NtA), or in the presence of 0.1  $\mu$ M GST-N-WASP-  
 464 CA (pink) in addition to 0.3  $\mu$ M G-actin. The results of the control experiments with  
 465 only 0.3  $\mu$ M G-actin are shown in grey. Data for each curve were obtained from  
 466 independent experiments. Schematic on right indicates actin branch survival status in  
 467 the assay (mother filament dark grey, daughter filaments light grey). **c)** Binding sites

468 of cortactin NtA (left, green) and N-WASP-CA (right, pink) on active Arp3 (orange) or  
469 inactive Arp3 (grey). Arp3 subdomains are numbered. **d)** Overlapping binding sites of  
470 cortactin NtA and VCA on Arp3 indicate how these proteins would compete for Arp3  
471 binding. Active/inactive Arp3 structures are superposed by alignment of subdomains  
472 3 and 4. Only a subset of Arp3 structural features are shown for clarity. **e)** Rotated  
473 view of overlaid active (orange) and inactive (grey) Arp3 structures with cortactin NtA  
474 and CA domain bound, as in (d). Conformational differences of Arp3  $\alpha$ -helices at the  
475 cortactin NtA and CA binding sites in the active/inactive Arp3 are indicated by arrows  
476 and explain the sensitivities of these binding partners to Arp3 activation state.

477

478

479 **Movie 1** – Reconstruction overview and conformational changes associated with  
480 activation of Arp2/3.

481 **Movie 2** – Cortactin stabilizes the daughter filament through both stabilization of  
482 activated Arp3 and stabilization of longitudinal contacts between daughter filament  
483 subunits.

484

## 485 REFERENCES

- 486 1 Schnoor, M., Stradal, T. E. & Rottner, K. Cortactin: Cell Functions of A  
487 Multifaceted Actin-Binding Protein. *Trends Cell Biol* **28**, 79-98,  
488 doi:10.1016/j.tcb.2017.10.009 (2018).
- 489 2 Ti, S. C., Jurgenson, C. T., Nolen, B. J. & Pollard, T. D. Structural and  
490 biochemical characterization of two binding sites for nucleation-promoting  
491 factor WASp-VCA on Arp2/3 complex. *Proc Natl Acad Sci U S A* **108**, E463-  
492 471, doi:10.1073/pnas.1100125108 (2011).
- 493 3 Zimmet, A. *et al.* Cryo-EM structure of NPF-bound human Arp2/3 complex and  
494 activation mechanism. *Sci Adv* **6**, doi:10.1126/sciadv.aaz7651 (2020).
- 495 4 Rottner, K., Faix, J., Bogdan, S., Linder, S. & Kerkhoff, E. Actin assembly  
496 mechanisms at a glance. *J Cell Sci* **130**, 3427-3435, doi:10.1242/jcs.206433  
497 (2017).
- 498 5 Gautreau, A. M., Fregoso, F. E., Simanov, G. & Dominguez, R. Nucleation,  
499 stabilization, and disassembly of branched actin networks. *Trends Cell Biol* **32**,  
500 421-432, doi:10.1016/j.tcb.2021.10.006 (2022).
- 501 6 Svitkina, T. M. Actin Cell Cortex: Structure and Molecular Organization. *Trends*  
502 *Cell Biol* **30**, 556-565, doi:10.1016/j.tcb.2020.03.005 (2020).
- 503 7 Ulferts, S., Prajapati, B., Grosse, R. & Vartiainen, M. K. Emerging Properties  
504 and Functions of Actin and Actin Filaments Inside the Nucleus. *Cold Spring*  
505 *Harb Perspect Biol* **13**, doi:10.1101/cshperspect.a040121 (2021).
- 506 8 Banerjee, S., Gardel, M. L. & Schwarz, U. S. The Actin Cytoskeleton as an  
507 Active Adaptive Material. *Annu Rev Condens Matter Phys* **11**, 421-439,  
508 doi:10.1146/annurev-conmatphys-031218-013231 (2020).

- 509 9 Kadzik, R. S., Homa, K. E. & Kovar, D. R. F-Actin Cytoskeleton Network Self-  
510 Organization Through Competition and Cooperation. *Annu Rev Cell Dev Biol*  
511 **36**, 35-60, doi:10.1146/annurev-cellbio-032320-094706 (2020).
- 512 10 Bieling, P. & Rottner, K. From WRC to Arp2/3: Collective molecular  
513 mechanisms of branched actin network assembly. *Curr Opin Cell Biol* **80**,  
514 102156, doi:10.1016/j.ceb.2023.102156 (2023).
- 515 11 Marchand, J. B., Kaiser, D. A., Pollard, T. D. & Higgs, H. N. Interaction of  
516 WASP/Scar proteins with actin and vertebrate Arp2/3 complex. *Nat Cell Biol* **3**,  
517 76-82, doi:10.1038/35050590 (2001).
- 518 12 Machesky, L. M. *et al.* Scar, a WASp-related protein, activates nucleation of  
519 actin filaments by the Arp2/3 complex. *Proc Natl Acad Sci U S A* **96**, 3739-3744,  
520 doi:10.1073/pnas.96.7.3739 (1999).
- 521 13 Chou, S. Z., Chatterjee, M. & Pollard, T. D. Mechanism of actin filament branch  
522 formation by Arp2/3 complex revealed by a high-resolution cryo-EM structure of  
523 the branch junction. *Proc Natl Acad Sci U S A* **119**, e2206722119,  
524 doi:10.1073/pnas.2206722119 (2022).
- 525 14 Shaaban, M., Chowdhury, S. & Nolen, B. J. Cryo-EM reveals the transition of  
526 Arp2/3 complex from inactive to nucleation-competent state. *Nature Structural*  
527 *& Molecular Biology* **27**, 1009-1016, doi:10.1038/s41594-020-0481-x (2020).
- 528 15 Miki, H. & Takenawa, T. Direct binding of the verprolin-homology domain in N-  
529 WASP to actin is essential for cytoskeletal reorganization. *Biochem Biophys*  
530 *Res Commun* **243**, 73-78, doi:10.1006/bbrc.1997.8064 (1998).
- 531 16 Higgs, H. N., Blanchoin, L. & Pollard, T. D. Influence of the C terminus of  
532 Wiskott-Aldrich syndrome protein (WASP) and the Arp2/3 complex on actin  
533 polymerization. *Biochemistry* **38**, 15212-15222, doi:10.1021/bi991843+ (1999).
- 534 17 Kelly, A. E., Kranitz, H., Dötsch, V. & Mullins, R. D. Actin binding to the central  
535 domain of WASP/Scar proteins plays a critical role in the activation of the  
536 Arp2/3 complex. *J Biol Chem* **281**, 10589-10597, doi:10.1074/jbc.M507470200  
537 (2006).
- 538 18 Panchal, S. C., Kaiser, D. A., Torres, E., Pollard, T. D. & Rosen, M. K. A  
539 conserved amphipathic helix in WASP/Scar proteins is essential for activation  
540 of Arp2/3 complex. *Nat Struct Biol* **10**, 591-598, doi:10.1038/nsb952 (2003).
- 541 19 Chereau, D. *et al.* Actin-bound structures of Wiskott-Aldrich syndrome protein  
542 (WASP)-homology domain 2 and the implications for filament assembly. *Proc*  
543 *Natl Acad Sci U S A* **102**, 16644-16649, doi:10.1073/pnas.0507021102 (2005).
- 544 20 Padrick, S. B., Doolittle, L. K., Brautigam, C. A., King, D. S. & Rosen, M. K.  
545 Arp2/3 complex is bound and activated by two WASP proteins. *Proc Natl Acad*  
546 *Sci U S A* **108**, E472-479, doi:10.1073/pnas.1100236108 (2011).
- 547 21 Gaucher, J. F. *et al.* Interactions of isolated C-terminal fragments of neural  
548 Wiskott-Aldrich syndrome protein (N-WASP) with actin and Arp2/3 complex. *J*  
549 *Biol Chem* **287**, 34646-34659, doi:10.1074/jbc.M112.394361 (2012).
- 550 22 Uruno, T., Liu, J., Li, Y., Smith, N. & Zhan, X. Sequential interaction of actin-  
551 related proteins 2 and 3 (Arp2/3) complex with neural Wiscott-Aldrich syndrome  
552 protein (N-WASP) and cortactin during branched actin filament network  
553 formation. *J Biol Chem* **278**, 26086-26093, doi:10.1074/jbc.M301997200  
554 (2003).
- 555 23 Helgeson, L. A. & Nolen, B. J. Mechanism of synergistic activation of Arp2/3  
556 complex by cortactin and N-WASP. *Elife* **2**, e00884, doi:10.7554/eLife.00884  
557 (2013).

- 558 24 Smith, B. A. *et al.* Three-color single molecule imaging shows WASP  
559 detachment from Arp2/3 complex triggers actin filament branch formation. *Elife*  
560 **2**, e01008, doi:10.7554/eLife.01008 (2013).
- 561 25 Lappalainen, P. & Drubin, D. G. Cofilin promotes rapid actin filament turnover  
562 in vivo. *Nature* **388**, 78-82, doi:10.1038/40418 (1997).
- 563 26 Goode, B. L., Drubin, D. G. & Lappalainen, P. Regulation of the cortical actin  
564 cytoskeleton in budding yeast by twinfilin, a ubiquitous actin monomer-  
565 sequestering protein. *J Cell Biol* **142**, 723-733, doi:10.1083/jcb.142.3.723  
566 (1998).
- 567 27 Cai, L., Makhov, A. M., Schafer, D. A. & Bear, J. E. Coronin 1B antagonizes  
568 cortactin and remodels Arp2/3-containing actin branches in lamellipodia. *Cell*  
569 **134**, 828-842, doi:10.1016/j.cell.2008.06.054 (2008).
- 570 28 Galloni, C. *et al.* MICAL2 enhances branched actin network disassembly by  
571 oxidizing Arp3B-containing Arp2/3 complexes. *J Cell Biol* **220**,  
572 doi:10.1083/jcb.202102043 (2021).
- 573 29 Xie, C. *et al.* Actin filament debranching regulates cell polarity during cell  
574 migration and asymmetric cell division. *Proc Natl Acad Sci U S A* **118**,  
575 doi:10.1073/pnas.2100805118 (2021).
- 576 30 Weed, S. A. *et al.* Cortactin localization to sites of actin assembly in lamellipodia  
577 requires interactions with F-actin and the Arp2/3 complex. *J Cell Biol* **151**, 29-  
578 40, doi:10.1083/jcb.151.1.29 (2000).
- 579 31 Uruno, T. *et al.* Activation of Arp2/3 complex-mediated actin polymerization by  
580 cortactin. *Nat Cell Biol* **3**, 259-266, doi:10.1038/35060051 (2001).
- 581 32 Weaver, A. M. *et al.* Cortactin promotes and stabilizes Arp2/3-induced actin  
582 filament network formation. *Curr Biol* **11**, 370-374, doi:10.1016/s0960-  
583 9822(01)00098-7 (2001).
- 584 33 Abella, J. V. *et al.* Isoform diversity in the Arp2/3 complex determines actin  
585 filament dynamics. *Nat Cell Biol* **18**, 76-86, doi:10.1038/ncb3286 (2016).
- 586 34 Weaver, A. M. *et al.* Interaction of cortactin and N-WASp with Arp2/3 complex.  
587 *Curr Biol* **12**, 1270-1278, doi:10.1016/s0960-9822(02)01035-7 (2002).
- 588 35 Sharafutdinov, I., Knorr, J., Rottner, K., Backert, S. & Tegtmeyer, N. Cortactin:  
589 A universal host cytoskeletal target of Gram-negative and Gram-positive  
590 bacterial pathogens. *Mol Microbiol* **118**, 623-636, doi:10.1111/mmi.15002  
591 (2022).
- 592 36 Bandela, M., Belvitch, P., Garcia, J. G. N. & Dudek, S. M. Cortactin in Lung Cell  
593 Function and Disease. *Int J Mol Sci* **23**, doi:10.3390/ijms23094606 (2022).
- 594 37 Ji, R., Zhu, X. J., Wang, Z. R. & Huang, L. Q. Cortactin in Epithelial-  
595 Mesenchymal Transition. *Front Cell Dev Biol* **8**, 585619,  
596 doi:10.3389/fcell.2020.585619 (2020).
- 597 38 Yamashita, A., Maeda, K. & Maeda, Y. Crystal structure of CapZ: structural  
598 basis for actin filament barbed end capping. *EMBO J* **22**, 1529-1538,  
599 doi:10.1093/emboj/cdg167 (2003).
- 600 39 Urnavicius, L. *et al.* The structure of the dynactin complex and its interaction  
601 with dynein. *Science* **347**, 1441-1446, doi:10.1126/science.aaa4080 (2015).
- 602 40 Funk, J. *et al.* A barbed end interference mechanism reveals how capping  
603 protein promotes nucleation in branched actin networks. *Nat Commun* **12**,  
604 5329, doi:10.1038/s41467-021-25682-5 (2021).
- 605 41 Carman, P. J., Barrie, K. R., Rebowski, G. & Dominguez, R. Structures of the  
606 free and capped ends of the actin filament. *Science*, eadg6812,  
607 doi:10.1126/science.adg6812 (2023).

- 608 42 Fäßler, F., Dimchev, G., Hodirnau, V. V., Wan, W. & Schur, F. K. M. Cryo-  
609 electron tomography structure of Arp2/3 complex in cells reveals new insights  
610 into the branch junction. *Nat Commun* **11**, 6437, doi:10.1038/s41467-020-  
611 20286-x (2020).
- 612 43 Ding, B. *et al.* Structure of Arp2/3 complex at a branched actin filament junction  
613 resolved by single-particle cryo-electron microscopy. *Proc Natl Acad Sci U S A*  
614 **119**, e2202723119, doi:10.1073/pnas.2202723119 (2022).
- 615 44 Oosterheert, W., Klink, B. U., Belyy, A., Pospich, S. & Raunser, S. Structural  
616 basis of actin filament assembly and aging. *Nature* **611**, 374-379,  
617 doi:10.1038/s41586-022-05241-8 (2022).
- 618 45 Reynolds, M. J., Hachicho, C., Carl, A. G., Gong, R. & Alushin, G. M. Bending  
619 forces and nucleotide state jointly regulate F-actin structure. *Nature* **611**, 380-  
620 386, doi:10.1038/s41586-022-05366-w (2022).
- 621 46 Robinson, R. C. *et al.* Crystal structure of Arp2/3 complex. *Science* **294**, 1679-  
622 1684, doi:10.1126/science.1066333 (2001).
- 623 47 Luan, Q., Liu, S. L., Helgeson, L. A. & Nolen, B. J. Structure of the nucleation-  
624 promoting factor SPIN90 bound to the actin filament nucleator Arp2/3 complex.  
625 *EMBO J* **37**, doi:10.15252/embj.2018100005 (2018).
- 626 48 Zhang, X. *et al.* HDAC6 modulates cell motility by altering the acetylation level  
627 of cortactin. *Mol Cell* **27**, 197-213, doi:10.1016/j.molcel.2007.05.033 (2007).
- 628 49 Cao, L., Ghasemi, F., Way, M., Jegou, A. & Romet-Lemonne, G. Regulation of  
629 branched versus linear Arp2/3-generated actin filaments. *EMBO J* **42**,  
630 e113008, doi:10.15252/embj.2022113008 (2023).
- 631 50 Zhang, S. & Vavylonis, D. Steps of actin filament branch formation by Arp2/3  
632 complex investigated with coarse-grained molecular dynamics. *Front Cell Dev*  
633 *Biol* **11**, 1071977, doi:10.3389/fcell.2023.1071977 (2023).
- 634 51 Helgeson, L. A., Prendergast, J. G., Wagner, A. R., Rodnick-Smith, M. & Nolen,  
635 B. J. Interactions with actin monomers, actin filaments, and Arp2/3 complex  
636 define the roles of WASP family proteins and cortactin in coordinately regulating  
637 branched actin networks. *J Biol Chem* **289**, 28856-28869,  
638 doi:10.1074/jbc.M114.587527 (2014).
- 639 52 Scherer, A. N., Anand, N. S. & Koleske, A. J. Cortactin stabilization of actin  
640 requires actin-binding repeats and linker, is disrupted by specific substitutions,  
641 and is independent of nucleotide state. *J Biol Chem* **293**, 13022-13032,  
642 doi:10.1074/jbc.RA118.004068 (2018).
- 643 53 Liu, S. L., Needham, K. M., May, J. R. & Nolen, B. J. Mechanism of a  
644 concentration-dependent switch between activation and inhibition of Arp2/3  
645 complex by coronin. *J Biol Chem* **286**, 17039-17046,  
646 doi:10.1074/jbc.M111.219964 (2011).
- 647 54 Sokolova, O. S. *et al.* Structural Basis of Arp2/3 Complex Inhibition by GMF,  
648 Coronin, and Arpin. *J Mol Biol* **429**, 237-248, doi:10.1016/j.jmb.2016.11.030  
649 (2017).
- 650 55 Xie, Y., Budhathoki, R. & Blankenship, J. T. Combinatorial deployment of F-  
651 actin regulators to build complex 3D actin structures in vivo. *Elife* **10**,  
652 doi:10.7554/eLife.63046 (2021).
- 653 56 Dominguez, R. Actin-binding proteins--a unifying hypothesis. *Trends Biochem*  
654 *Sci* **29**, 572-578, doi:10.1016/j.tibs.2004.09.004 (2004).
- 655 57 Baldauf, L. *et al.* Biomimetic actin cortices shape cell-sized lipid vesicles.  
656 *bioRxiv*, 2023.2001.2015.524117, doi:10.1101/2023.01.15.524117 (2023).

- 657 58 Punjani, A., Rubinstein, J. L., Fleet, D. J. & Brubaker, M. A. cryoSPARC:  
658 algorithms for rapid unsupervised cryo-EM structure determination. *Nat*  
659 *Methods* **14**, 290-296, doi:10.1038/nmeth.4169 (2017).
- 660 59 Jumper, J. *et al.* Highly accurate protein structure prediction with AlphaFold.  
661 *Nature* **596**, 583-589, doi:10.1038/s41586-021-03819-2 (2021).
- 662 60 Varadi, M. *et al.* AlphaFold Protein Structure Database: massively expanding  
663 the structural coverage of protein-sequence space with high-accuracy models.  
664 *Nucleic Acids Res* **50**, D439-D444, doi:10.1093/nar/gkab1061 (2022).
- 665 61 Pettersen, E. F. *et al.* UCSF ChimeraX: Structure visualization for researchers,  
666 educators, and developers. *Protein Sci* **30**, 70-82, doi:10.1002/pro.3943 (2021).
- 667 62 Croll, T. I. ISOLDE: a physically realistic environment for model building into  
668 low-resolution electron-density maps. *Acta Crystallogr D Struct Biol* **74**, 519-  
669 530, doi:10.1107/S2059798318002425 (2018).
- 670 63 Kidmose, R. T. *et al.* Namdinator - automatic molecular dynamics flexible fitting  
671 of structural models into cryo-EM and crystallography experimental maps.  
672 *IUCrJ* **6**, 526-531, doi:10.1107/S2052252519007619 (2019).
- 673 64 Emsley, P., Lohkamp, B., Scott, W. G. & Cowtan, K. Features and development  
674 of Coot. *Acta Crystallogr D Biol Crystallogr* **66**, 486-501,  
675 doi:10.1107/S0907444910007493 (2010).
- 676 65 Jegou, A. *et al.* Individual actin filaments in a microfluidic flow reveal the  
677 mechanism of ATP hydrolysis and give insight into the properties of profilin.  
678 *PLoS Biol* **9**, e1001161, doi:10.1371/journal.pbio.1001161 (2011).  
679
